# Supplementary material for: WITHDRAWN: Association between Thoracic epidural anesthesia and postoperative complications in Neoadjuvant chemotherapy patients: a propensity score-matching study
Source: Research Square preprint supplement (doi:10.21203/rs.3.rs-6652994/v1), 2025-06-16
Supplement: Supplementary file 1 [file 2aa3e6c2ae3cfd3a73cf7333.docx]

**Table S1. Definitions of postoperative complications**

| **Event** | **Definition** |
| --- | --- |
| Anastomotic leakage | Characterized by the breakdown of a surgical anastomosis, leading to the leakage of luminal contents into the abdominal or thoracic cavity. The gold standard for diagnosing anastomotic leakage, showing extraluminal contrast, fluid collections, air bubbles, or an abscess near the anastomotic site via CT. |
| Intra-abdomina or pelvic infection | Intra-abdominal or pelvic infection refers to an infectious process within the peritoneal cavity or pelvic region, often resulting from perforation, surgery, trauma, or hematogenous spread. The gold standard for diagnosing intra-abdomina or pelvic infection, showing abscesses, free air (indicating perforation), and fluid collections can differentiate between solid and fluid-filled lesions via CT. |
| Nausea and vomiting | Includes postoperative nausea or vomiting symptoms. |
| Gastrointestinal hemorrhage | Symptoms of bloody diarrhea, hypotension (systolic blood pressure 90 mm Hg), Tachycardia (≥120 beats min-1), orthostatic changes in blood pressure (≥10 mmHg) or heart rate (≥30 beats min-1), nasogastric aspirate shows blood or coffee ground-like material, pallor, perioral telangiectasias, and skin abnormalities. |
| Bowel obstruction | Tolerance of oral ingestion, nausea, vomiting, physical signs of ileus (Intake, Feeling nauseated, Emesis, physical Examination, and duration of symptoms “I-FEED”). |
| Delayed gastric emptying | A region of interest drawn around the isotope residing in the human stomach enables accurate measurement of gastric emptying. Radiolabelled food is still visible in the stomach by scintigraphy after 4 hours, which demonstrates delayed gastric emptying. |
| Chylous fistula | Patients typically present with persistent milky-white drainage from a surgical site, drain, or wound. Symptoms may include swelling, discomfort, electrolyte imbalances, and nutritional deficiencies if the fluid loss is significant. Chylous fluid is characterized by: elevated triglyceride levels (>110 mg dL-1 or >1.2 mmol L-1), presence of chylomicrons, high lymphocyte count, and low cholesterol levels. CT or MRI with contrast may help identify associated lymphatic abnormalities or underlying causes such as malignancies. |
| Anastomotic stricture | A narrowing of a surgically created anastomosis in the gastrointestinal tract, leading to obstruction or impaired passage of luminal contents. Esophagogastroduodenoscopy for Esophageal and Gastric Strictures is the direct visualization of the stricture. |
| Diarrhoea | Diarrhoea is defined as the passage of loose or watery stools, typically occurring three or more times per day. Acute diarrhea: lasts less than 14 days, often caused by infections (viral, bacterial, or parasitic) or food poisoning. |
| Pneumonia | Pneumonia is an acute infection of the lung parenchyma that leads to inflammation, alveolar filling with exudate, and impaired gas exchange. Positive cultures of sputum, transtracheal fluid, bronchial washings, and/or clinical findings consistent with the diagnosis of pneumonia (which may include chest x-ray diagnostic of pulmonary infiltrates). |
| Atelectasis | Atelectasis refers to the partial or complete collapse of lung tissue due to inadequate alveolar expansion, resulting in impaired gas exchange. CT scan can identify underlying causes, such as airway obstructions. |
| Pleural effusion | Pleural effusion is the abnormal accumulation of fluid in the pleural space. CT scan can identify underlying causes, such as infection, or pulmonary embolism. |
| Empyema | Empyema is a purulent infection of the pleural space, typically resulting from bacterial pneumonia, lung abscess, or thoracic surgery. CT is essential for differentiating empyema from simple parapneumonic effusion. |
| Need for mechanical ventilation | Mechanical ventilation provides respiratory support by either invasive (endotracheal or tracheostomy tube) or non-invasive (mask or nasal interface) means. A patient may require mechanical ventilation if they exhibit: severe respiratory distress (e.g., increased work of breathing, use of accessory muscles, paradoxical breathing); hypoxemia unresponsive to oxygen therapy (PaO2 < 60 mmHg on FiO2 > 60%); hypercapnia with respiratory acidosis (pH < 7.25, PaCO2 > 50 mmHg); altered mental status due to respiratory failure (e.g., confusion, lethargy, coma); severe hemodynamic instability requiring airway protection; and airway compromise due to trauma, aspiration, or upper airway obstruction. |
| Respiratory failure | A term characterized by the inability of normal oxygenation or removal of carbon dioxide. Hypoxemic respiratory failure or type 1 describes a lack of oxygenation where there is a PaO2 of less than 60 in arterial blood. Hypercapnic respiratory failure or type 2 describes an acidotic state in which there is a PaCO2 greater than 50 in arterial blood. |
| ARDS | ARDS is a life-threatening form of acute respiratory failure. The Berlin Definition is the most widely accepted criteria for diagnosing ARDS: Timing: onset within 1 week of a known clinical insult (e.g., pneumonia, sepsis, trauma) or new or worsening respiratory symptoms; Chest Imaging: bilateral opacities consistent with pulmonary edema on chest X-ray or CT scan, not fully explained by effusions, lung collapse, or nodules; Origin of Edema: respiratory failure not fully explained by cardiac failure or fluid overload (requires objective assessment such as echocardiography if no clear risk factors are present); Oxygenation Impairment PaO2 /FiO2 < 200 mmHg. |
| Arrhythmia | Indicate whether the patient had a new onset of atrial arrhythmia requiring treatment. Does not include the recurrence of previously documented arrhythmia which had been present preoperatively. |
| Heart failure | Physician documentation or report of any of the following clinical symptoms of heart failure described as unusual dyspnea on light exertion, recurrent dyspnea occurring in the supine position, fluid retention; or the description of rales, jugular venous distension, pulmonary edema on physical exam, or pulmonary edema on chest x-ray presumed to be cardiac dysfunction. A low ejection fraction alone, without clinical evidence of heart failure, does not qualify as heart failure. |
| Myocardial ischaemia | Myocardial ischemia occurs when there is an insufficient supply of oxygenated blood to the myocardium due to a mismatch between myocardial oxygen demand and coronary blood supply. Electrocardiogram ST-segment changes (depression or elevation) or T-wave abnormalities during ischemia. |
| Hypoxemia | An integrated area under a postoperative oxyhemoglobin saturation of 95%. |
| Stroke | Indicate whether the patient has a postoperative stroke (i.e., any confirmed neurological deficit of abrupt onset caused by a disturbance in blood supply to the brain) that did not resolve within 24 hours. |
| Delayed wound healing | Delayed wound healing refers to the prolonged or inadequate healing of a wound, typically beyond the expected time frame, which can result from various factors such as infection, poor circulation, underlying chronic conditions, or nutritional deficiencies. |
| Drainage site infection | Drainage site infection refers to the localized infection occurring at the site of a surgical drain or any other device inserted into a wound to evacuate fluids such as blood, pus, or serous fluid. |
| Urinary tract infection | Urinary tract infection is an infection in any part of the urinary system, including the kidneys, bladder, urethra, or ureters. |
| Sepsis | Sepsis is the systemic response to infection. Report this variable if the patient has two of the following clinical signs and symptoms of SIRS: -Temp >38 ℃ or <36 ℃; -Heart rate >90 bpm; -Respiratory rate >20 breaths/min or PaCO2 <32 mmHg; -While blood cells >12000 cell/mm3, <4000 cells/mm3, or >10% immature (band) forms; -Anion gap acidosis defined by either: [Na + K] – [Cl + HCO3 (or serum CO2)] >16 or Na – [Cl + HCO3 (or serum CO2)] >12. And either A or B below: A. One of the following: -positive blood culture; -clinical documentation of purulence or positive culture from any site for which there is documentation noting the site as the acute cause of sepsis. B. The patient must meet SIRS criteria within 48 hours after the principal operative procedure and one of the following findings during the principal operative procedure: -Confirmed infarcted bowel requiring resection; -Purulence in the operative site; -Enteric contents in the operative site, or -Positive intra-operative cultures. |
| DVT | DVT is the formation of thrombi in the deep veins, most commonly the large veins of the legs or pelvis. Clinical features, such as pain, warmth, and erythema; a pretest probability of DVT should be determined using validated clinical prediction rules. it should be used in conjunction with D-dimer testing to determine whether diagnostic imaging is necessary. |
| Pulmonary embolism | Pulmonary embolism (PE) is the obstruction of one or more pulmonary arteries in the lungs, usually caused by blood clots that travel from the deep veins of the legs or other parts of the body (deep vein thrombosis, or DVT). The gold standard for diagnosing PE. It involves the use of contrast dye to visualize the pulmonary arteries and detect blockages caused by embolism. |
| SSI | SSIs are divided into incisional SSI and organ/space SSI. Incisional SSI are further classified into those involving only the skin and subcutaneous tissue (called superficial incisional SSI) and those involving deep soft tissues of the incision (called deep incisional SSI [e.g., fascial and muscle layers]). Organ/space SSI involves any part of the anatomy (e.g., organs or spaces), other than the incision, opened or manipulated during the operative procedure. |
| Myocardial infarction | An acute myocardial infarction that occurs intraoperatively or within 30 days following surgery as manifested by one of the following: 1. Documentation of ECG changes indicative of acute MI (one or more of the following): -ST elevation >1 mm in two or more contiguous leads; -New left bundle branch; -New q-wave in two or more contiguous leads. 2. New elevation in troponin greater than 3 times the upper level of the reference range in the setting of suspected myocardial ischemia. |
| Cerebral infarction | Cerebral infarction occurs when a blockage or narrowing of the blood vessels supplying the brain leads to reduced blood flow and oxygen supply to the brain tissue. MRI angiography can help identify the specific arterial occlusion or narrowing that caused the infarction, such as in large artery atherosclerosis or cerebral artery dissection. |
| Acute kidney injury | AKI is characterized by an abrupt increase in serum creatinine or a decrease in urine output over a short period, typically hours to days. A rise in serum creatinine is one of the primary markers of kidney dysfunction. A significant increase (≥ 0.3 mg dL-1 within 48 hours or ≥ 50% increase from baseline. |
| Urinary retention | Urinary retention is the inability to empty the bladder completely or the failure to initiate urination. It can be acute (sudden onset) or chronic (gradual onset). Ultrasound can be used to measure residual urine in the bladder after urination. Persistent high residual volumes (more than 100 mL) suggest significant urinary retention. |
| Ureteral injury | Ureteral injury refers to damage or trauma to the ureters, the tubes that carry urine from the kidneys to the bladder. CT Urography can help identify the location and extent of the injury, as well as complications like hydronephrosis, urine extravasation, or contrast extravasation outside the ureter. |
| Renal insufficiency | A patient without dialysis preoperatively has worsening renal dysfunction postoperatively requiring hemodialysis, peritoneal dialysis, hemofiltration, hemodiafiltration, or ultrafiltration. Placement of a dialysis catheter is indicative of the need for dialysis if used within 48 hours of placement. |
| Renal replacement therapy | Renal replacement therapy (RRT) is a medical treatment used to replace the normal blood-filtering functions of the kidneys in patients with kidney failure. |
| Acute liver injury | ALI refers to a rapid deterioration in liver function, typically within days or weeks, characterized by an increase in liver enzymes, jaundice, or coagulopathy. Elevated levels of ALT and AST are indicative of hepatocellular injury. ALT is more specific to the liver, while AST is found in other organs like the heart and muscles. |

Abbreviations: CT, computed tomography, MRI, magnetic resonance imaging, ARDS, acute respiratory distress syndrome, SIRS, systemic inflammatory response syndrome, DVT, deep venous thrombosis, PE, pulmonary embolism, SSI, surgical site infection, ECG, electrocardiogram, MI, myocardial infarction, AKI, acute kidney injury, RRT, renal replacement therapy, ALI, acute liver injury, ALT, alanine aminotransferase, AST, aspartate aminotransferase.

**Table S2. Demographic, clinical, and pathology characteristics of overall cohort**

|  | Overall cohort (*n* = 365) |
| --- | --- |
| Age, median (IQR), y | 60.0 (52.0-69.0) |
| Sex, n (%) |  |
| Male | 259 (71.0%) |
| Female | 106 (29.0%) |
| BMI, median (IQR), kg m-2 | 23.0 (20.8-25.0) |
| ASA physical status, n (%) |  |
| Ⅰ | 244 (66.8%) |
| Ⅱ | 89 (24.4%) |
| Ⅲ | 32 (8.8%) |
| CCI, median (IQR) | 5.0 (4.0-7.0) |
| Baseline MAP, median (IQR), mmHg | 92.0 (86.7-98.7) |
| Baseline HR, median (IQR), beats min-1 | 72.0 (70.0-78.0) |
| Ejection fraction, median (IQR), % | 66.0 (64.0-68.0) |
| Creatinine level, median (IQR), mg dL-1 | 74.0 (63.0-87.0) |
| ALT level, median (IQR), U L-1 | 14.0 (10.0-21.0) |
| D-dimer level, median (IQR), mg L-1 | 0.4 (0.2-0.7) |
| Index year, n (%) |  |
| 2020 | 52 (14.2%) |
| 2021 | 69 (18.9%) |
| 2022 | 244 (66.8%) |
| Surgery type, n (%) |  |
| Gastrectomy | 106 (29.0%) |
| Colorectal resection | 259 (71.0%) |
| Histologic type, n (%) |  |
| Adenocarcinoma | 350 (95.9%) |
| Myxedema | 11 (3.0%) |
| Other | 4 (1.1%) a |
| Tumor differentiation, n (%) |  |
| Well and Moderate | 313 (85.8%) |
| Poor | 52 (14.2%) |
| Perineural invasion, n (%) | 175 (47.9%) |
| Tumor thrombosis, n (%) | 161 (44.1%) |
| Post-treatment AJCC 8th edition stage, n (%) |  |
| Ⅰ | 23 (6.3%) |
| Ⅱ | 93 (25.5%) |
| Ⅲ | 86 (23.6%) |
| Ⅳ | 163 (44.7%) |

Abbreviations: IQR, interquartile range; BMI, body mass index; CCI, Charlson Comorbidity Index; MAP, mean arterial pressure; HR, heart rate; ALT, glutamic pyruvic transaminase; AJCC, American Joint Committee on Cancer.

a, two patients had neuroendocrine carcinoma, and two patients had undifferentiated carcinoma.

**Table S3. Neoadjuvant chemotherapy characteristics of overall cohort**

|  | Overall cohort (*n* = 365) |
| --- | --- |
| Chemotherapy regimen, n (%) |  |
| FOLFOX | 136 (37.3%) |
| XELOX | 87 (23.8%) |
| SOX | 49 (13.4%) |
| FOLFIRI | 45 (12.3%) |
| AS | 22 (6.0%) |
| FOLT | 11 (3.0%) |
| DOS | 8 (2.2%) |
| XELIRI | 4 (1.1%) |
| Other | 3 (0.8%) a |
| With targeted drugs, n (%) | 146 (40.0%) |
| With radiotherapy, n (%) | 88 (24.1%) |
| Chemotherapy cycle, n (%) |  |
| 1-2 | 73 (20.0%) |
| 3 | 96 (26.3%) |
| >3 | 196 (53.7%) |
| Adverse reactions of NACT, n (%) | 51 (14.0%) |
| Post-NACT creatinine level,  median (IQR), mg dL-1 | 68.0 (57.0-81.0) |
| Post-NACT ALT level,  median (IQR), U L-1 | 20.0 (14.0-33.0) |
| Post-NACT D-dimer level,  median (IQR), mg L-1 | 0.8 (0.4-2.0) |

Abbreviations: FOLFOX, folinic acid, fluorouracil and oxaliplatin; XELOX, capecitabine and oxaliplatin; SOX, tegafur and oxaliplatin; FOLFIRI, irinotecan, leucovorin calcium and fluorouracil; AS, paclitaxel and tegafur gimeracil oteracil potassium; FOLT, 5-fluorouracil, oxaliplatin, tegafur gimeracil oteracil potassium and leucovorin calcium; DOS, docetaxel, capecitabine and oxaliplatin; XELIRI, fluorouracil, leucovorin, and oxaliplatin; IQR, interquartile range; NACT, neoadjuvant chemotherapy; ALT, glutamic pyruvic transaminase.

a, two patients received treatment with only monoclonal antibody therapy, one patient received treatment with cyclophosphamide, doxorubicin, oncovin, and prednisone (CHOP) chemotherapy.

**Table S4. Demographic, clinical, and pathology characteristics after IPTW and OW adjustment**

|  | **IPTW** |  |  |  | **OW** |  |  |  |
| --- | --- | --- | --- | --- | --- | --- | --- | --- |
|  | **GA**  **(*n* = 213)** | **TEA+GA**  **(*n* = 152)** | ***P***  **value** | **SMD** | **GA**  **(*n* = 213)** | **TEA+GA**  **(*n* = 152)** | ***P***  **value** | **SMD** |
| ***Demographics*** |  |  |  |  |  |  |  |  |
| Age, median (IQR) | 60.0 (53.0-69.0) | 61.0 (50.8-70.0) | 0.773 | 0.044 | 60.0 (53.0-68.0) | 60.0 (50.4-68.0) | 0.923 | <0.001 |
| Sex |  |  | 0.997 | <0.001 |  |  | 1.000 | <0.001 |
| Male | reference | reference |  |  | reference | reference |  |  |
| Female, % | 28.1 | 28.1 |  |  | 26.8 | 26.8 |  |  |
| BMI, median (IQR) | 22.8 (21.0-25.6) | 23.7 (21.0-24.5) | 0.554 | 0.025 | 22.6 (20.9-25.9) | 23.0 (21.0-24.5) | 0.681 | <0.001 |
| ***Clinical characteristics*** |  |  |  |  |  |  |  |  |
| ASA physical status, % |  |  | 0.514 | 0.151 |  |  | 1.000 | <0.001 |
| Ⅰ | 67.0 | 65.3 |  |  | 68.6 | 68.6 |  |  |
| Ⅱ | 24.2 | 29.0 |  |  | 24.5 | 24.5 |  |  |
| Ⅲ | 8.9 | 5.7 |  |  | 7.0 | 7.0 |  |  |
| CCI, median (IQR) | 5.0 (3.0-7.0) | 5.0 (4.0-7.0) | 0.727 | 0.070 | 6.0 (3.0-8.0) | 5.4 (4.0-7.0) | 0.980 | <0.001 |
| Baseline MAP, median (IQR) , mmHg | 92.0 (85.3-98.3) | 92.0 (88.0-97.0) | 0.461 | 0.045 | 92.0 (86.7-99.3) | 92.0 (88.0-97.5) | 0.771 | <0.001 |
| Baseline HR, median (IQR), beats min-1 | 72.0 (70.0-78.0) | 75.0 (70.0-80.0) | 0.433 | 0.065 | 72.0 (70.0-78.0) | 73.6 (68.9-78.0) | 0.943 | <0.001 |
| Ejection fraction, median (IQR), % | 66.0 (64.0-68.0) | 66.0 (62.0-68.0) | 0.493 | 0.055 | 66.0 (64.0-68.0) | 66.0 (63.1-68.0) | 0.922 | <0.001 |
| Creatinine level, median (IQR), mg dL-1 | 73.0 (62.0-86.0) | 76.0 (64.5-91.0) | 0.186 | 0.082 | 74.0 (63.0-87.8) | 76.0 (64.0-88.8) | 0.505 | <0.001 |
| ALT level, median (IQR), U L-1 | 14.0 (10.0-21.0) | 13.0 (10.0-21.0) | 0.512 | 0.083 | 14.0 (10.0-19.0) | 13.0 (10.0-22.0) | 0.808 | <0.001 |
| D-dimer level, median (IQR), mg L-1 | 0.4 (0.2-0.7) | 0.4 (0.2-0.7) | 0.490 | 0.085 | 0.4 (0.2-0.7) | 0.4 (0.2-0.8) | 0.797 | <0.001 |
| Index year, % |  |  | 0.953 | 0.035 |  |  | 0.928 | 0.045 |
| 2020 | 12.8 | 12.2 |  |  | 13.6 | 14.4 |  |  |
| 2021 | 18.4 | 17.4 |  |  | 19.8 | 18.1 |  |  |
| 2022 | 68.8 | 70.4 |  |  | 66.6 | 67.5 |  |  |
| ***Pathology*** |  |  |  |  |  |  |  |  |
| Surgery type, % |  |  | 0.766 | 0.037 |  |  | 1.000 | <0.001 |
| Gastrectomy | reference | reference |  |  | reference | reference |  |  |
| Colorectal resection | 72.2 | 73.9 |  |  | 71.7 | 71.7 |  |  |
| Histologic type, % |  |  | 0.955 | 0.031 |  |  | 1.000 | <0.001 |
| Adenocarcinoma | 1.0 | 0.9 |  |  | 1.1 | 1.1 |  |  |
| Myxoadenoma | 96.3 | 95.9 |  |  | 95.6 | 95.6 |  |  |
| Other | 2.7 | 3.2 |  |  | 3.3 | 3.3 |  |  |
| Tumor differentiation, % |  |  | 0.977 | 0.004 |  |  | 1.000 | <0.001 |
| Well and Moderate | reference | reference |  |  | reference | reference |  |  |
| Poor | 14.4 | 14.5 |  |  | 13.6 | 13.6 |  |  |
| Perineural invasion | 46.7 | 42.5 | 0.525 | 0.085 | 46.7 | 46.7 | 1.000 | <0.001 |
| Tumor thrombosis | 43.7 | 41.8 | 0.765 | 0.040 | 46.1 | 46.1 | 1.000 | <0.001 |
| Post treatment AJCC stage, % |  |  | 0.682 | 0.151 |  |  | 1.000 | <0.001 |
| Ⅰ | 5.2 | 5.1 |  |  | 5.7 | 5.7 |  |  |
| Ⅱ | 27.4 | 25.2 |  |  | 27.7 | 27.7 |  |  |
| Ⅲ | 24.0 | 30.6 |  |  | 19.1 | 19.1 |  |  |
| Ⅳ | 43.4 | 39.1 |  |  | 47.5 | 47.5 |  |  |

Abbreviations: IPTW, Inverse Probability of Treatment Weighting; OW, Overlap Weighting; GA, general anesthesia; TEA+GA, thoracic epidural analgesia combined with general anesthesia; SMD, standardized mean difference; SD, standard deviation; IQR, interquartile range; BMI, body mass index; CCI, Charlson Comorbidity Index; MAP, mean arterial pressure; HR, heart rate; ALT, glutamic pyruvic transaminase; AJCC, American Joint Committee on Cancer.

*p<0.05

**
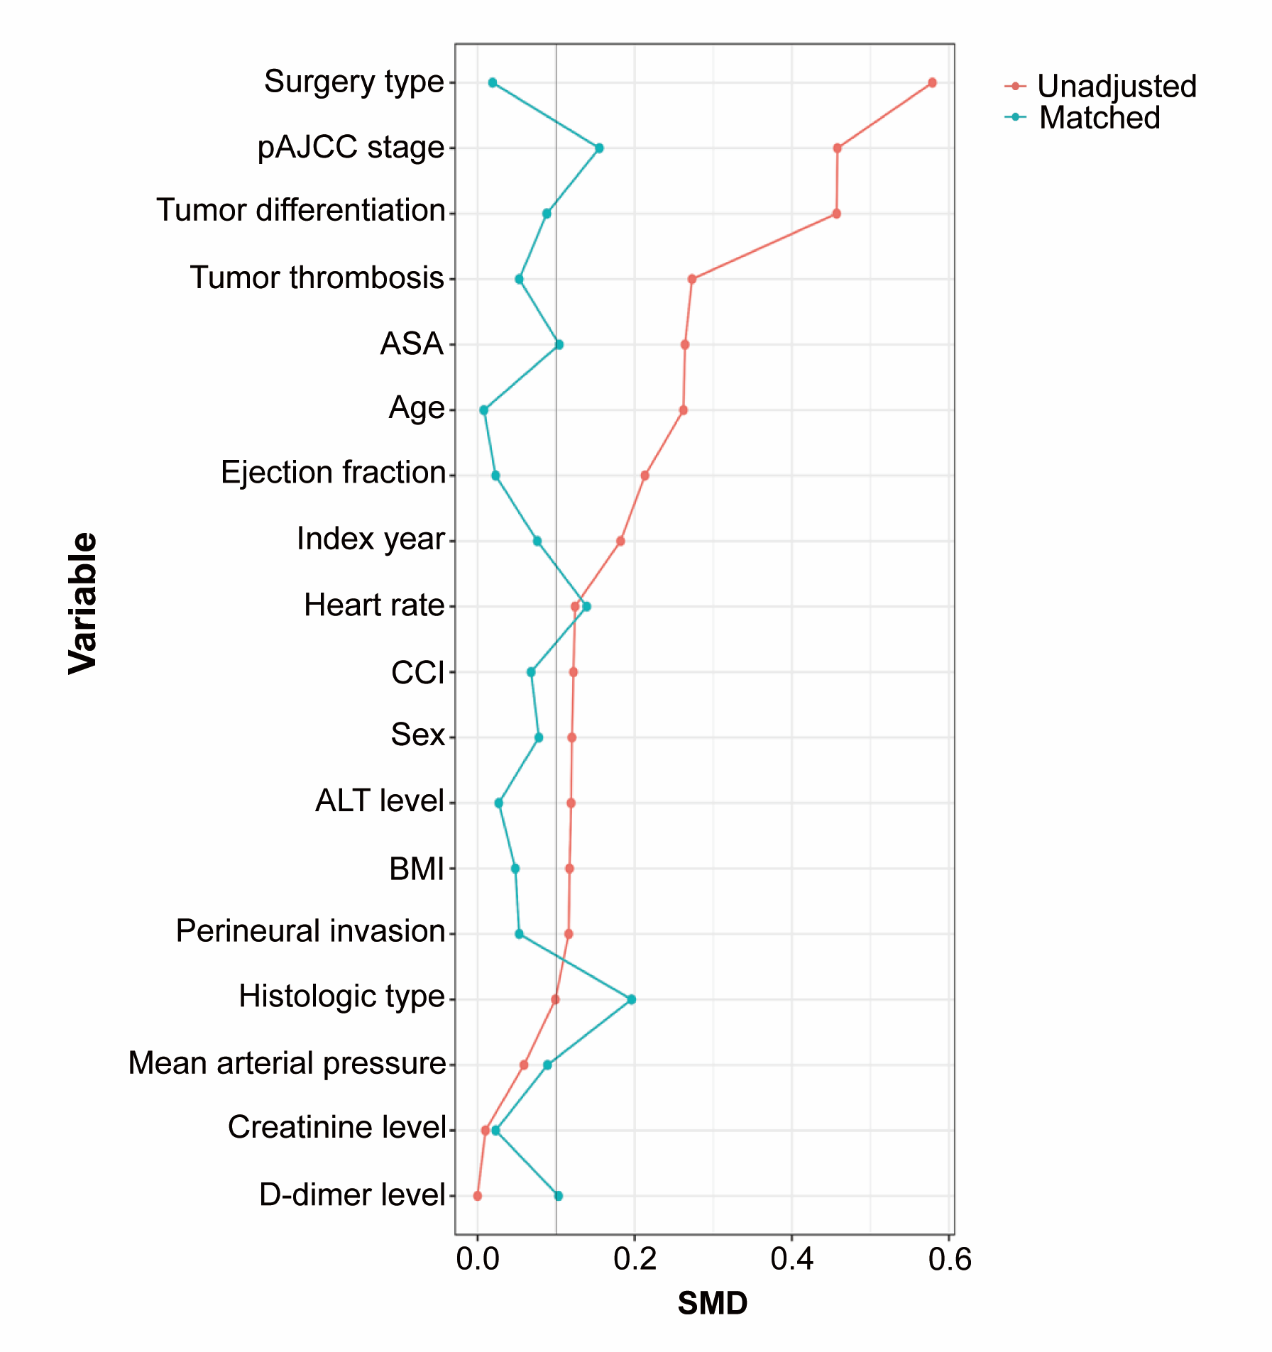
** **Fig.S1. PSM plot of demographic, baseline, and pathological data**
